# Supplementary material
Source: publisher site journal article supplement (https://www.spandidos-publications.com/2212/downloadSupplementary)

Figure S1. Flow cytometry plots for the cell cycle distribution of BxPC-3 cells following treatment with various agents.

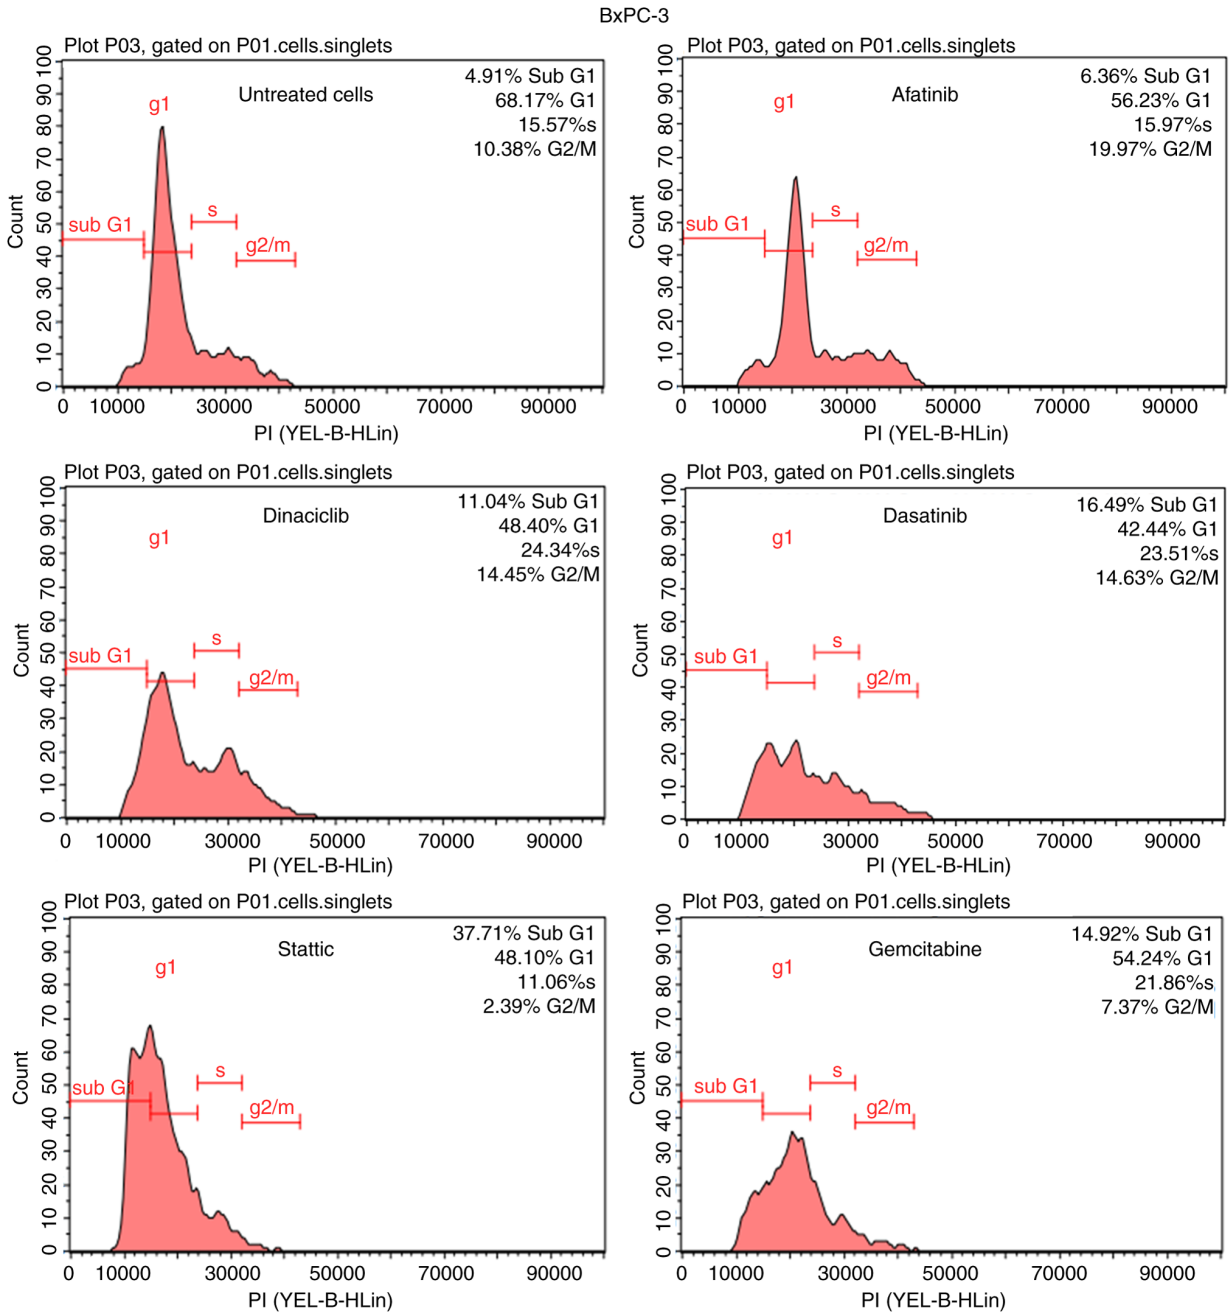

Supplement: Supplementary file 1 [file downloadSupplementary]
